# Supplementary figures and images for: Association between gut microbiome-related metabolites and symptomatic hand osteoarthritis in two independent cohorts
Source: PubMed Central journal article supplement — eBioMedicine. 2023 Nov 24;98:104892. doi: 10.1016/j.ebiom.2023.104892 (PMC10775900; doi:10.1016/j.ebiom.2023.104892), 2023-11-24

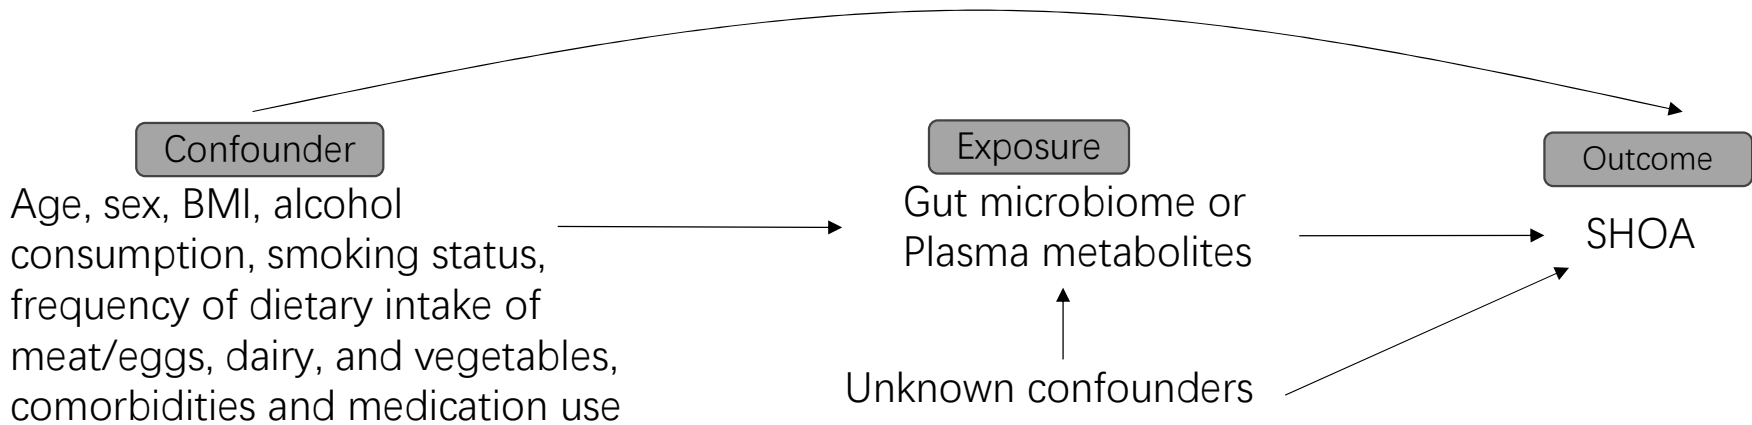

Supplement: mmc2.pdf [file mmc2.pdf]

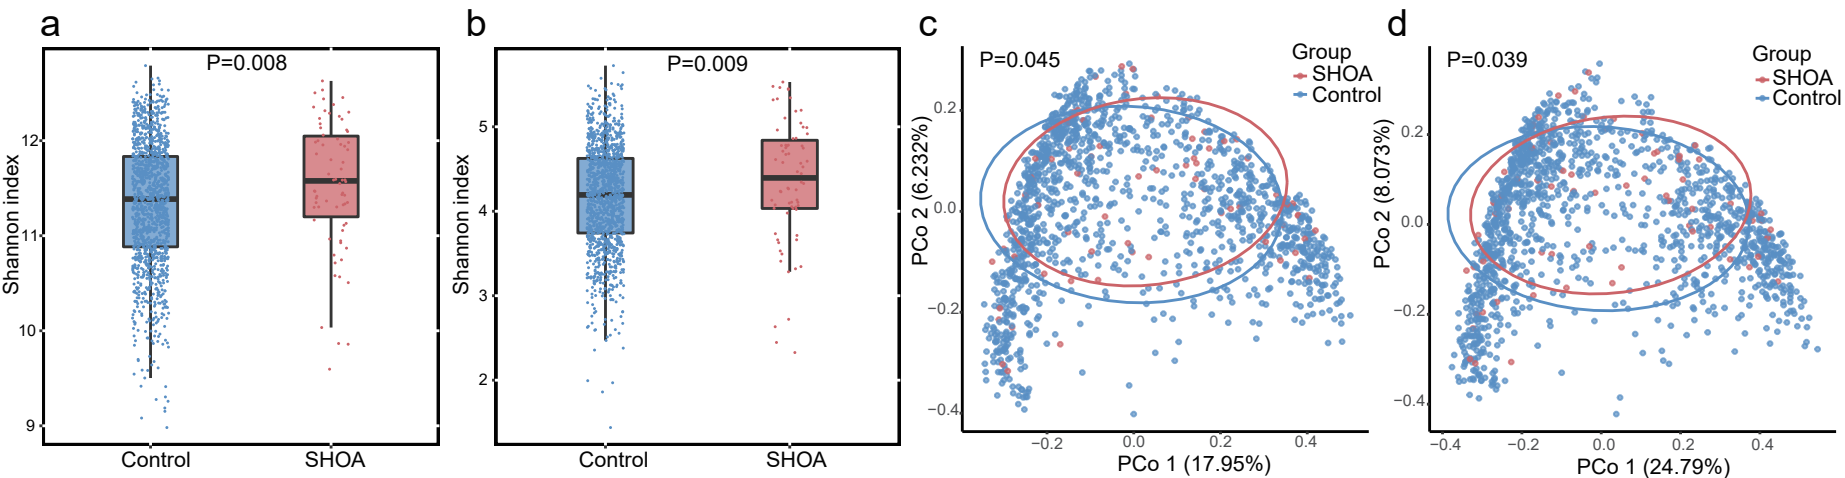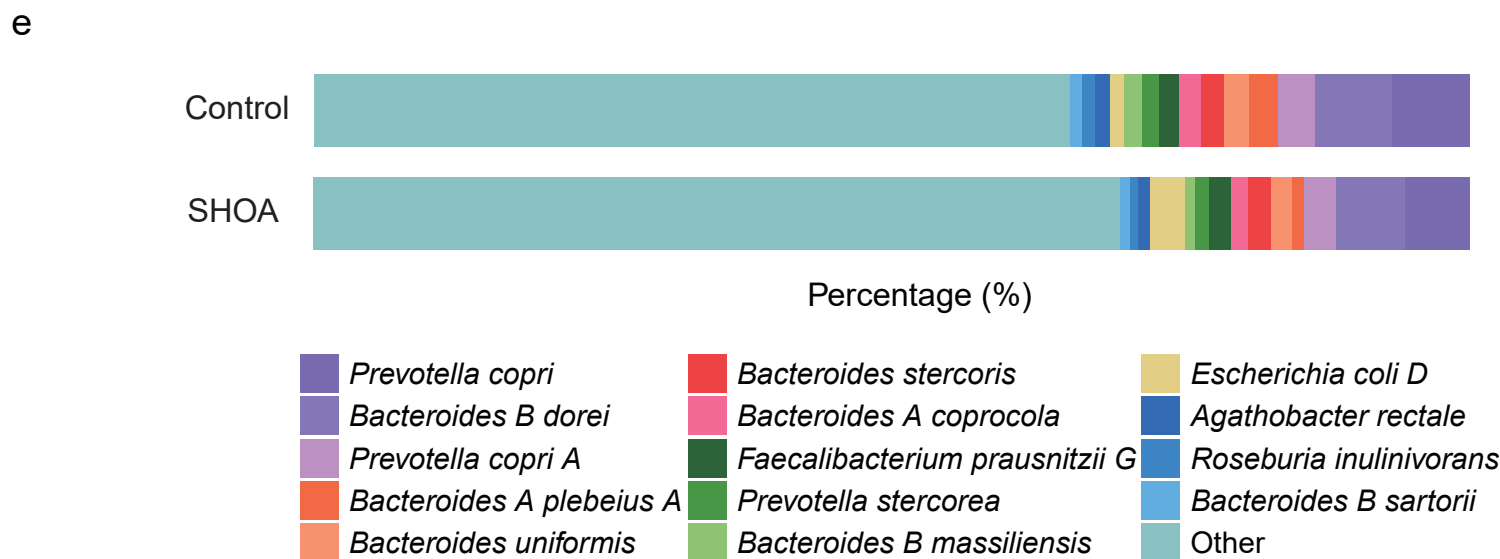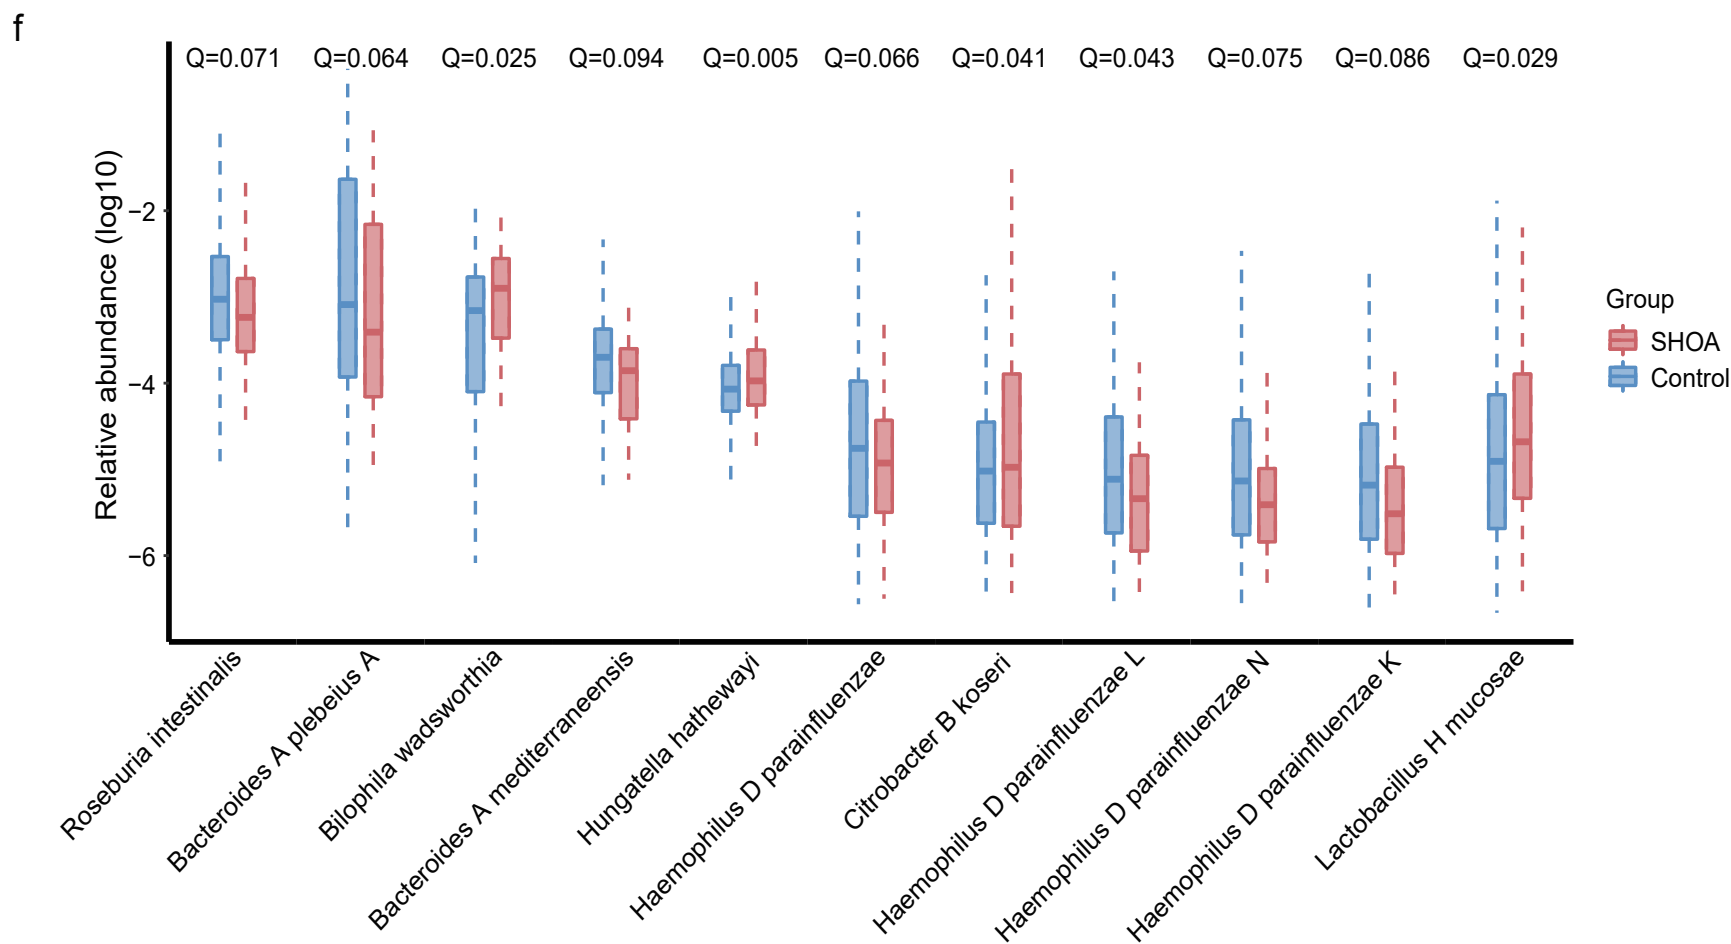

Supplement: mmc3.pdf [file mmc3.pdf]

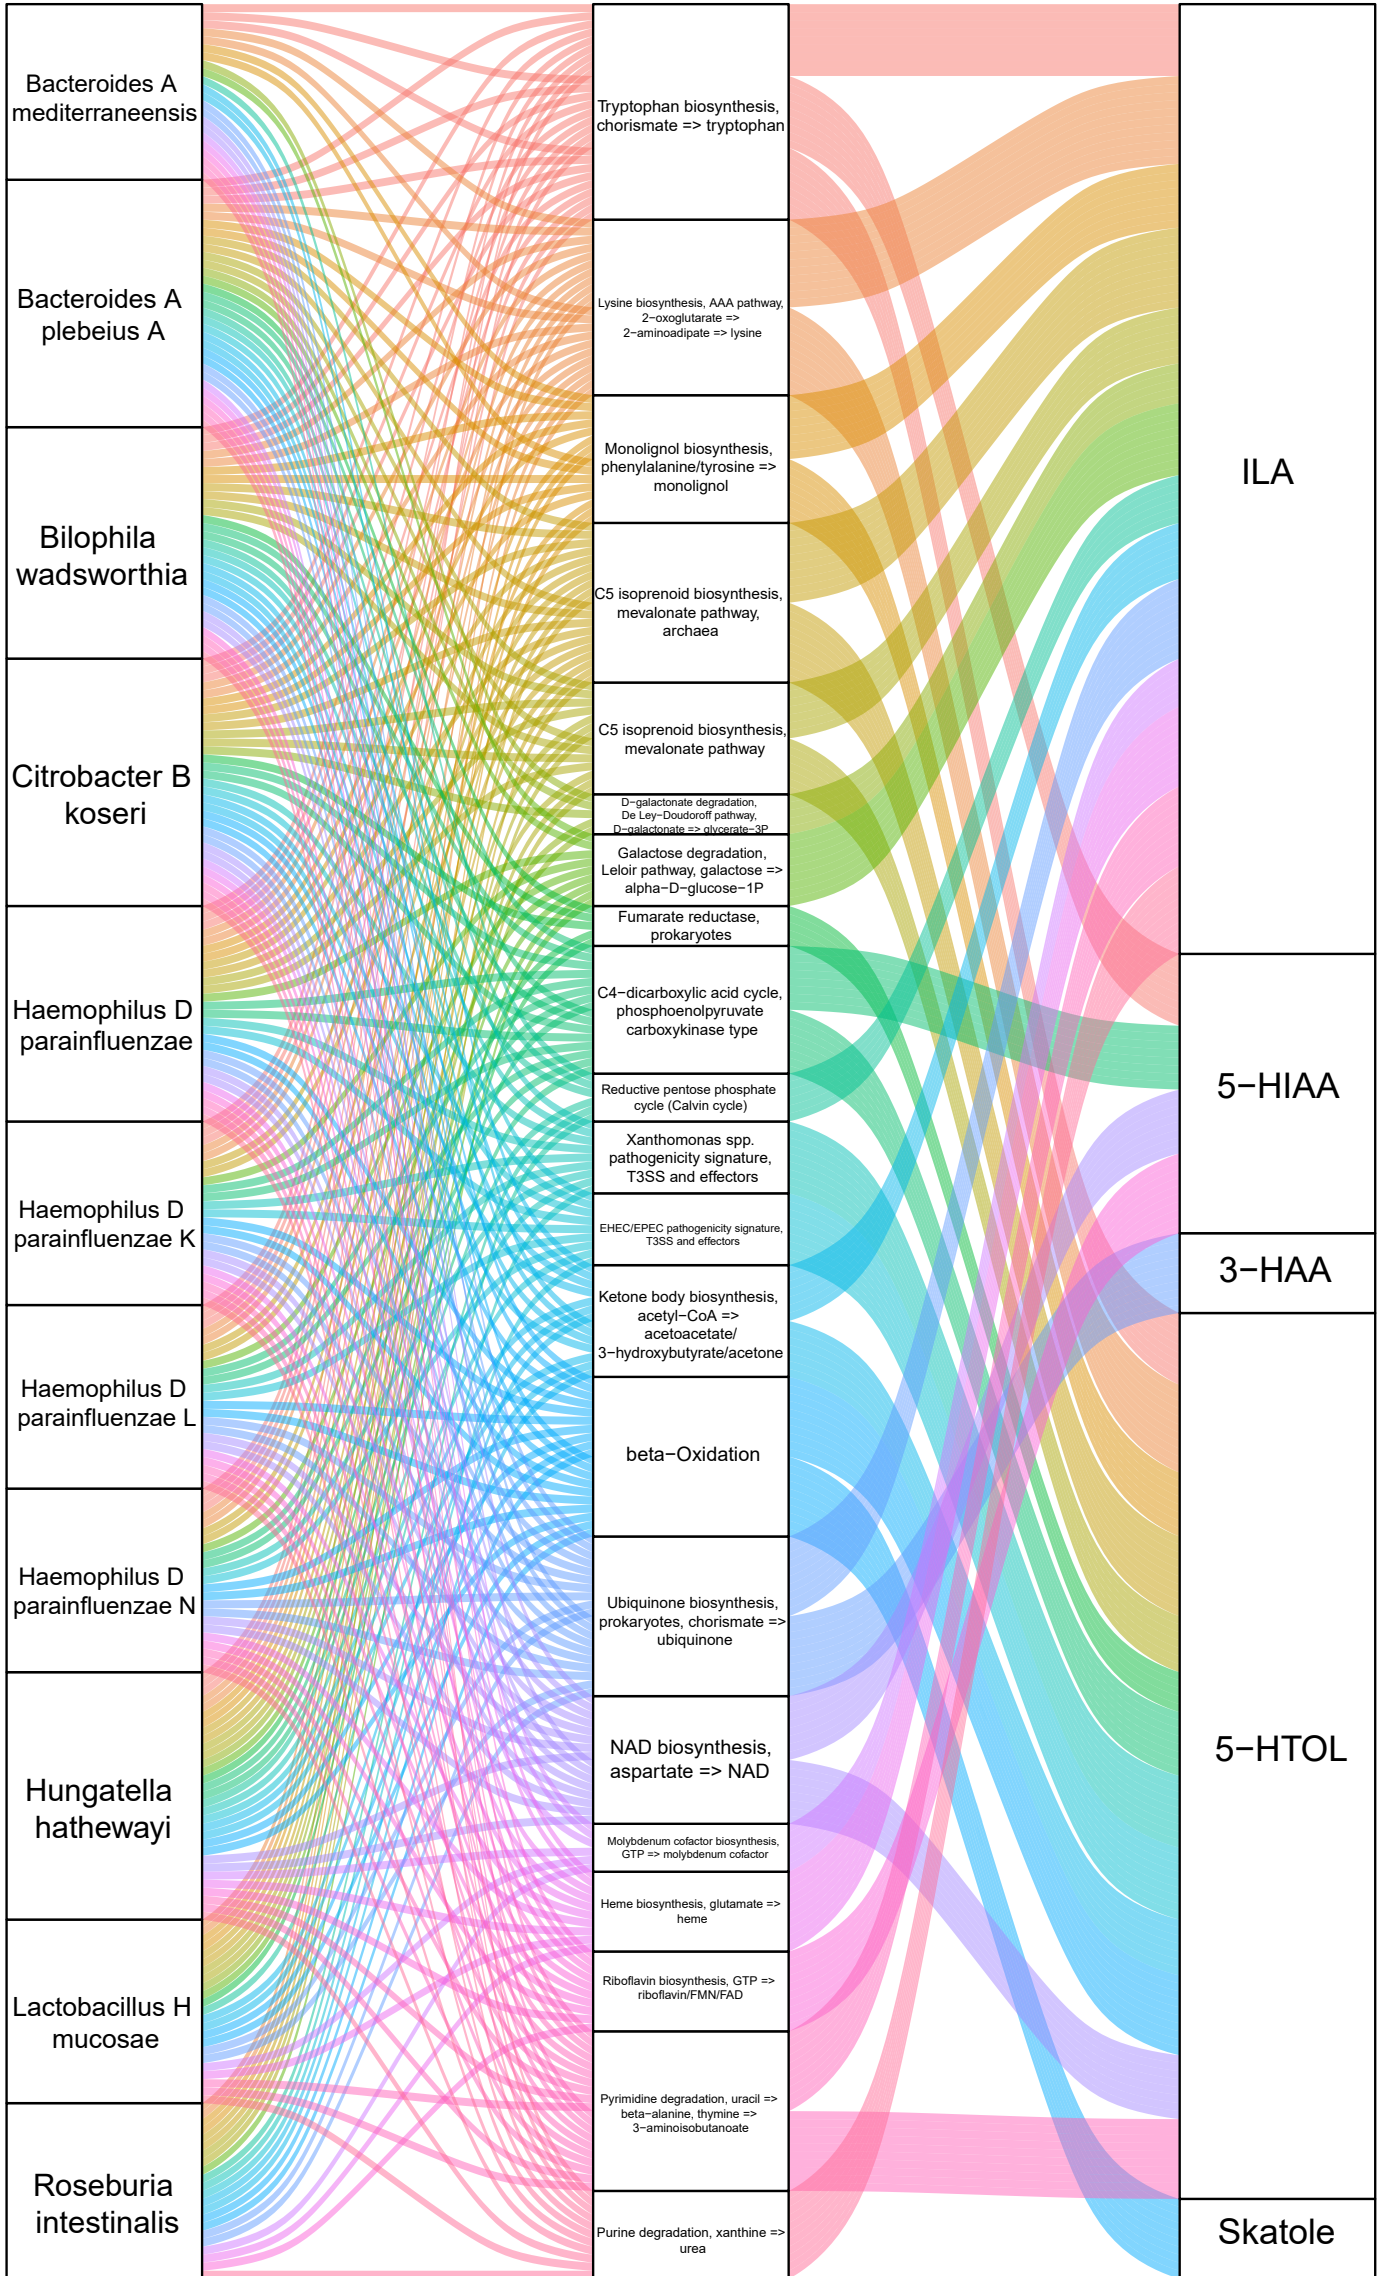

Supplement: mmc4.pdf [file mmc4.pdf]

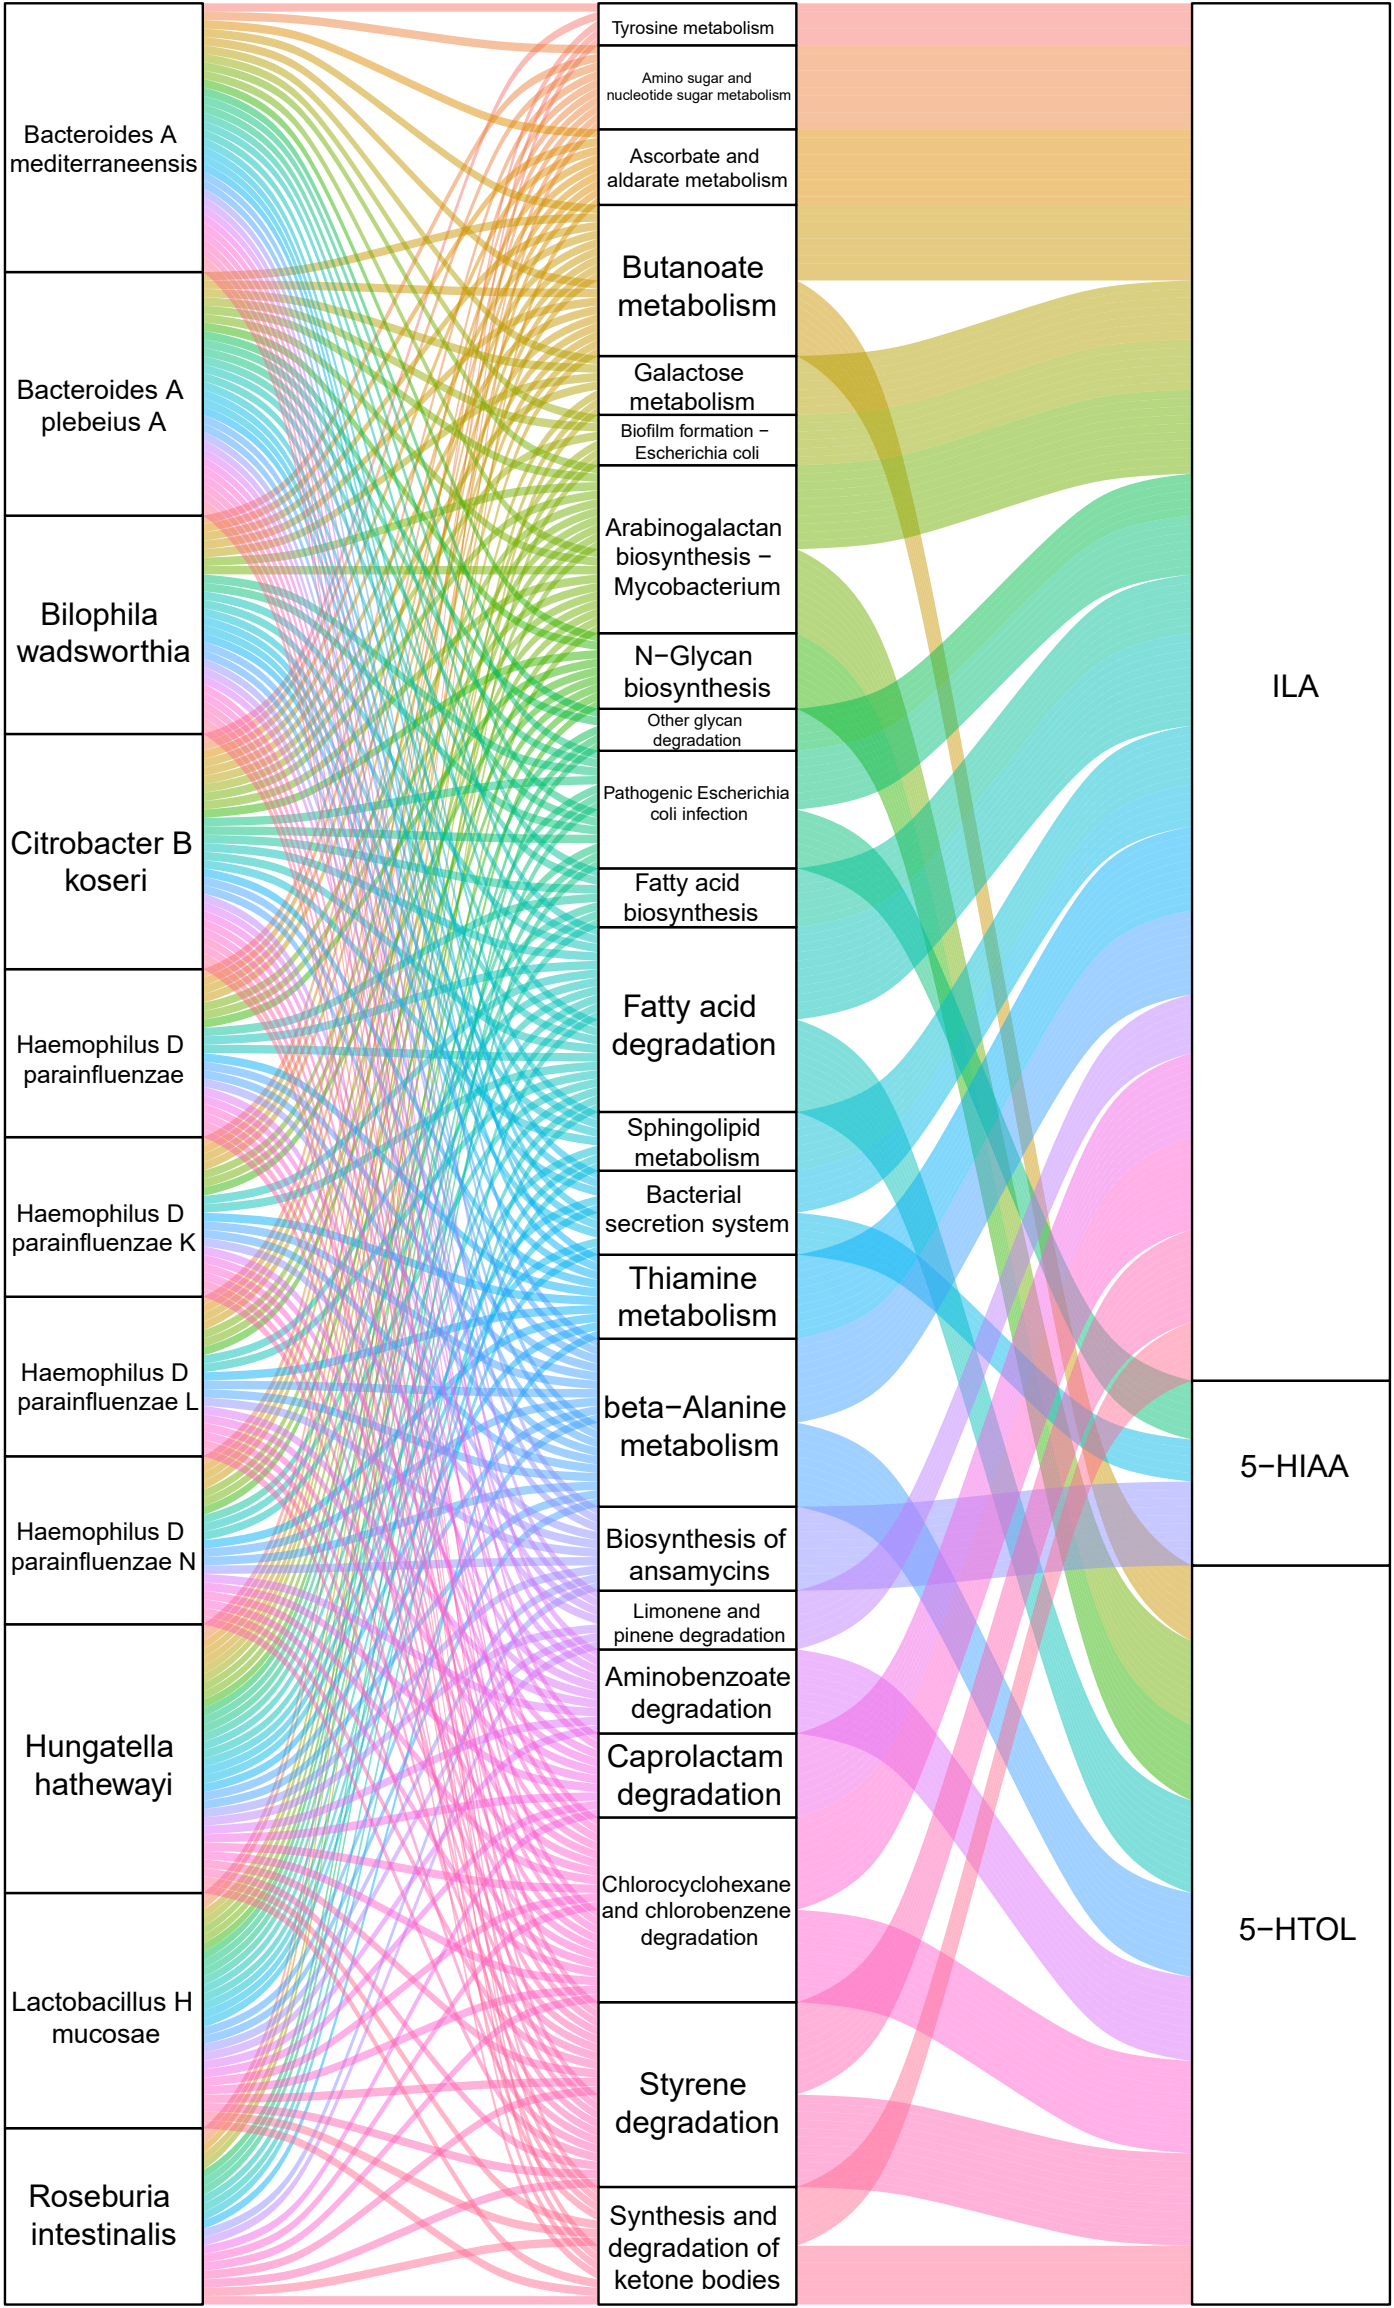

Supplement: mmc5.pdf [file mmc5.pdf]
